# Supplementary material
Source: PubMed Central journal article supplement (PMC7114588)
Supplement: mmc2.pdf [file mmc2.pdf]

**National Taiwan University Hospital  
Infections Case record form**

Bed \_\_\_\_\_ Chart \_\_\_\_\_ Case No. \_\_\_\_\_ Dept \_\_\_\_\_

Name \_\_\_\_\_ Sex \_\_\_\_\_ Age \_\_\_\_\_ Diag \_\_\_\_\_

Admission Y M D Transfer In Y M D Transfer Out Y M D Discharge Y M D Status \_\_\_\_\_

| Infection site |       |       |       | Antibiotics |       |       |       | OPERATION |       |       |       |
|----------------|-------|-------|-------|-------------|-------|-------|-------|-----------|-------|-------|-------|
| Card Number    | Y     | M     | D     | Site1       | Site2 | TOIP  | NNIS  | day       | Y     | M     | D     |
| _____          | _____ | _____ | _____ | _____       | _____ | _____ | _____ | time      | _____ | _____ | _____ |
| _____          | _____ | _____ | _____ | _____       | _____ | _____ | _____ | re-op     | _____ | _____ | _____ |
| _____          | _____ | _____ | _____ | _____       | _____ | _____ | _____ | operator  | _____ | _____ | _____ |
| _____          | _____ | _____ | _____ | _____       | _____ | _____ | _____ | mode      | _____ | _____ | _____ |
| _____          | _____ | _____ | _____ | _____       | _____ | _____ | _____ | class     | _____ | ASA   | _____ |
| _____          | _____ | _____ | _____ | _____       | _____ | _____ | _____ | RISK      | _____ | _____ | _____ |

**SIGNS & SYMPTOM**

**I. General**

- Asymptom
- Inflammation
- fever
- WBC < 4,000/mm<sup>3</sup>
- WBC > 12000/mm<sup>3</sup>
- pus
- Dr. diag

**II. Urinary**

- burning
- supra pub pain
- hematuria
- dysuria
- urgency
- freq
- WBC > 10HPF

**III. Resp**

- New onset of purulent sputum (≥ 25 PMN, ≤ 10 Epi)
- Change in character of sputum, or ↑ respiratory secretions, or ↑ suctioning requirements
- new onset or worsening cough or dyspnea, apnea, or tachypnea
- rales or crackles/rhonchi
- Worsening gas exchange (e.g., O<sub>2</sub> desats [e.g., PaO<sub>2</sub>/FiO<sub>2</sub> < 240], ↑ O<sub>2</sub> req, or ↑ ventilation demand)
- CxR infiltration/Consolidation
- Chest Pain

**Predisposing factors**

- |                                                           |                                    |
|-----------------------------------------------------------|------------------------------------|
| <input type="checkbox"/> DM                               | <input type="checkbox"/> Perm cath |
| <input type="checkbox"/> Bile                             | <input type="checkbox"/> Organ Tx  |
| <input type="checkbox"/> Ca                               | <input type="checkbox"/> OTHER     |
| <input type="checkbox"/> WBC < 1000                       | <input type="checkbox"/> SWI       |
| <input type="checkbox"/> P/D <input type="checkbox"/> H/D | <input type="checkbox"/> UTI       |
| <input type="checkbox"/> IV                               | <input type="checkbox"/> RTI       |
| <input type="checkbox"/> D/L                              | <input type="checkbox"/> GII       |
| <input type="checkbox"/> Port-A                           | <input type="checkbox"/> Skin      |
| <input type="checkbox"/> PICC                             | <input type="checkbox"/> Ascites   |
|                                                           | <input type="checkbox"/> discharge |
|                                                           | <input type="checkbox"/> urine     |
|                                                           | <input type="checkbox"/> sputum    |

**TREATMENT**

**I. Urinary**

- 101 foley \_\_\_\_\_
- 102 Catheter prn \_\_\_\_\_
- 103 ICP \_\_\_\_\_
- 104 cont bdr irrig \_\_\_\_\_
- 105 cystofix \_\_\_\_\_
- 107 ileal conduit \_\_\_\_\_
- 108 cystoscope \_\_\_\_\_
- 109 PCN \_\_\_\_\_
- 110 D-J \_\_\_\_\_
- 111 CICP \_\_\_\_\_
- 112 CMG \_\_\_\_\_
- 113 TWT \_\_\_\_\_

**II. Surgery**

- 201 implant \_\_\_\_\_
- 202 drain \_\_\_\_\_

**III. Respiratory**

- 301 chest tube \_\_\_\_\_
- 302 endo tube \_\_\_\_\_
- 303 respirator \_\_\_\_\_

**IV. Blood**

- 401 Catheter \_\_\_\_\_
- 402 CVP \_\_\_\_\_
- 403 Hickman \_\_\_\_\_
- 404 TPN \_\_\_\_\_
- 405 Arterial L \_\_\_\_\_
- 408 Blood trans \_\_\_\_\_
- 409 swan ganze \_\_\_\_\_
- 410 Port-A \_\_\_\_\_
- 411 Double lumen \_\_\_\_\_
- 412 Um. catheter \_\_\_\_\_
- 413 CT contrast \_\_\_\_\_
- 414 Angio \_\_\_\_\_
- 415 Endoscopy \_\_\_\_\_
- 416 Endoscopy biopsy \_\_\_\_\_
- 417 PTC \_\_\_\_\_

**418 PTCD**

- 419 ERCP \_\_\_\_\_
- 420 ENBD \_\_\_\_\_
- 421 IABP \_\_\_\_\_
- 422 Cardiac cath \_\_\_\_\_
- 423 BMT \_\_\_\_\_
- 424 Port-A Right Angle Needle \_\_\_\_\_
- 425 Temporary pacemaker \_\_\_\_\_
- 426 Permanent pacemaker \_\_\_\_\_
- 427 ECMO \_\_\_\_\_
- 428 Perm cath \_\_\_\_\_
- Others \_\_\_\_\_

**V. Therapy**

- 501 anti-ca C/T \_\_\_\_\_
- 502 H/D \_\_\_\_\_
- 503 P/D \_\_\_\_\_
- 504 R/T \_\_\_\_\_
- 508 CVVH \_\_\_\_\_

**VI. Other**

- 601 CAPD \_\_\_\_\_

SIGN \_\_\_\_\_  
DATE \_\_\_\_\_
